# Supplementary material for: Exosome loaded immunomodulatory biomaterials alleviate local immune response in immunocompetent diabetic mice post islet xenotransplantation
Source: PubMed Central journal article supplement (PMC8175379; doi:10.1038/s42003-021-02229-4), 2021-06-03
Supplement: 42003_2021_2229_MOESM1_ESM.pdf [file 42003_2021_2229_MOESM1_ESM.pdf]

# Supplementary Information

## Exosome loaded immunomodulatory biomaterials alleviate local immune response in immunocompetent diabetic mice post islet xenotransplantation

*M. Rezaa Mohammadi<sup>1,2,3</sup>, Samuel Mathew Rodriguez<sup>2</sup>, Jennifer Cam Luong<sup>2,3</sup>, Shiri Li<sup>3</sup>, Rui Cao<sup>2,3</sup>, Hamad Alshetaiwi<sup>4</sup>, Hien Lau<sup>2</sup>, Hayk Davtyan<sup>2,5</sup>, Mathew Blurton Jones<sup>2,5,6,7</sup>, Mahtab Jafari<sup>8</sup>, Kai Kessenbrock<sup>4</sup>, S. Armando Villalta<sup>7</sup>, Paul de Vos<sup>9</sup>, Weian Zhao<sup>2,8,10</sup>, Jonathan RT Lakey<sup>2,3,\*</sup>*

<sup>1</sup>Department of Materials Science and Engineering, University of California Irvine, CA, 92617, USA

<sup>2</sup>Sue and Bill Stem Cell Center, University of California Irvine, CA 92617, USA

<sup>3</sup>Department of Surgery; Department of Biomedical Engineering, University of California Irvine, CA 92868, USA

<sup>4</sup>Department of Biological Chemistry, University of California, Irvine, Irvine, CA 92697, USA

<sup>5</sup>Institute for Memory Impairments and Neurological Disorders, University of California, Irvine, Irvine, CA 92696, USA

<sup>6</sup>Department of Neurobiology and Behavior, University of California, Irvine, Irvine, CA 92696, USA

<sup>7</sup>Institute for Immunology, University of California Irvine, Irvine, CA 92697, USA

<sup>8</sup>Department of Pharmaceutical Sciences, University of California Irvine, Irvine, CA 92697, USA

<sup>9</sup>Department of Pathology and Medical Biology, section Immunoendocrinology, University of Groningen, University Medical Center Groningen, Groningen, The Netherlands

<sup>10</sup>Chao Family Comprehensive Cancer Center; Edwards Life Sciences Center for Advanced Cardiovascular Technology; Department of Biomedical Engineering, Department of Biological Chemistry, University of California, Irvine, Irvine, CA 92696, USA

\*Correspondence to Jonathan RT Lakey (jlakey@uci.edu)

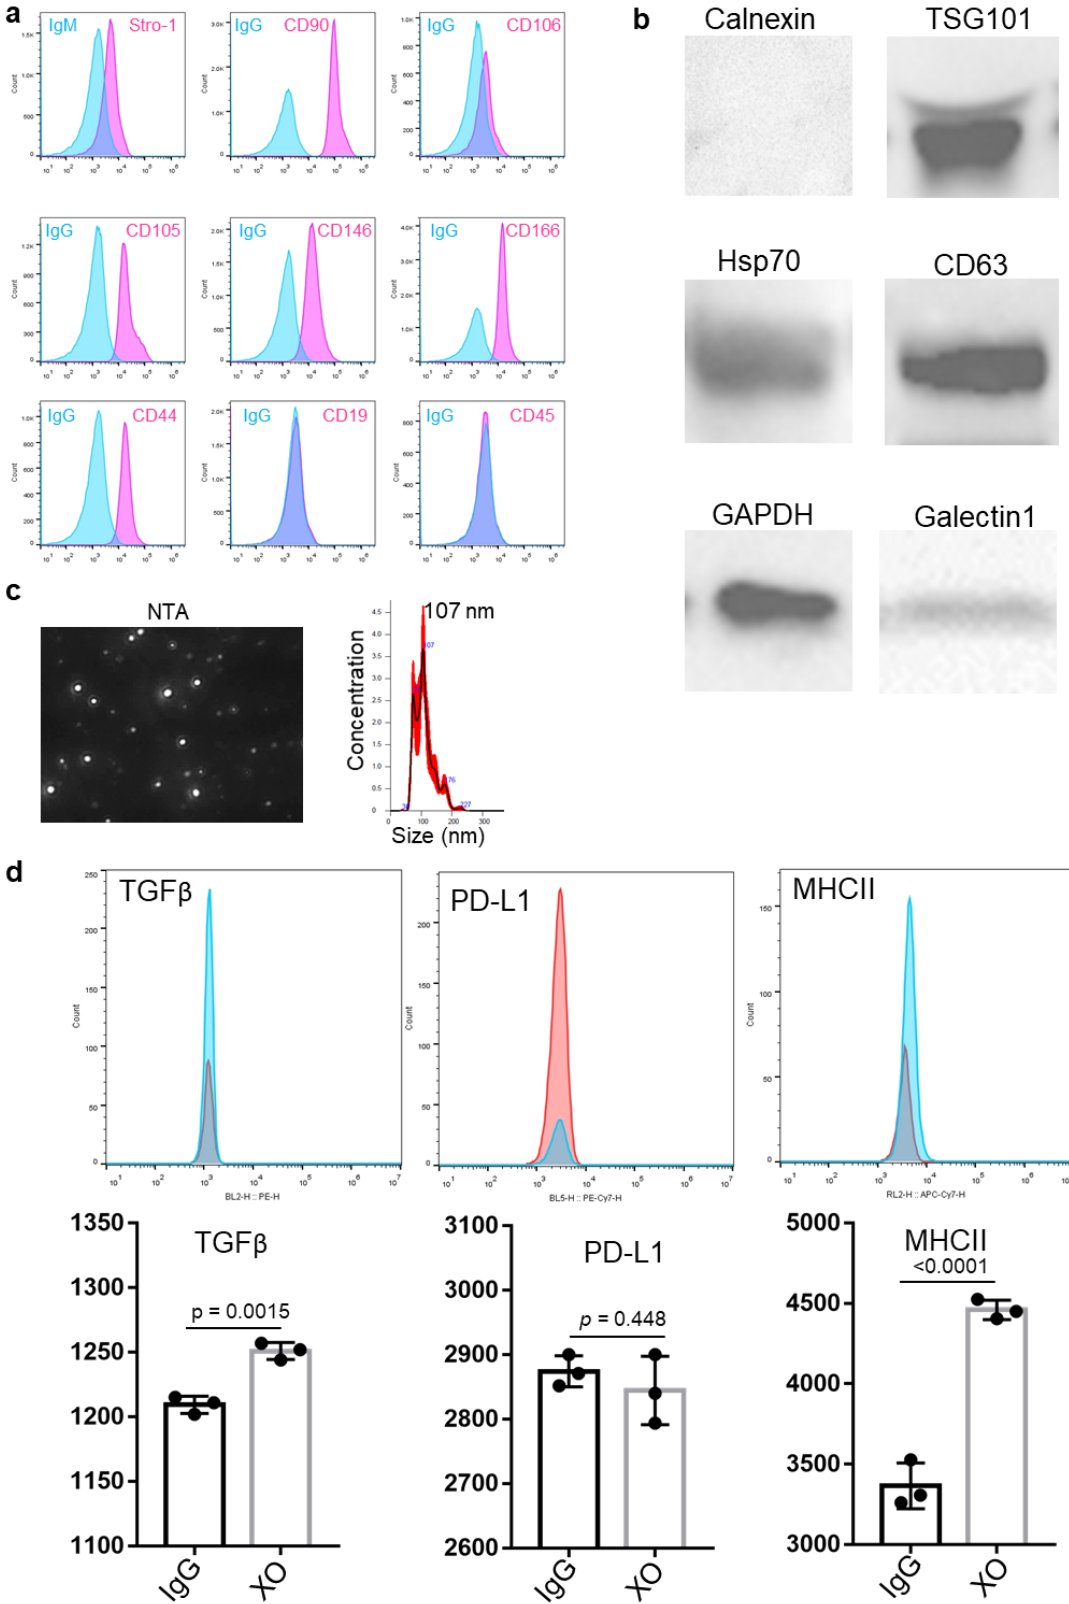

Supplementary Figure 1. Umbilical Cord Derived Stem Cells (MSCs) and their secreted XOs characterization.

37 **a)** Cells were characterized for their surface markers, showing the low expression of Stro-1, high expression  
38 CD90/Thy1, CD146/MCAM, CD105/Endoglin, CD166, CD44 while cells are negative for CD19, CD45 and CD106.  
39 Cells were then cultured as described in the Materials & Methods section, and XOs were isolated. **b)** Isolated XOs  
40 were then characterized using established biomarkers using Western blotting. XOs were positive for CD63, Galectin  
41 1, TSG101, HSP70, Hsp70, and negative for and endoplasmic reticulum marker Calnexin. **c)** XOs possess spherical  
42 shape with the  $105 \pm 48$  nm as an average size for maximum quantity of vesicles, based on NTA analyses. It should  
43 be noted that in average,  $1.7 \times 10^{12} \pm 7.6 \times 10^{10}$  XOs/mL were isolated from ~ 150 to 190 million cultured MSCs in  
44 100% confluency. **d)** Flow cytometry analysis of TGF $\beta$ , PD-L1, and MHCII expression on XOs bound to anti-CD63-  
45 coated beads. Statistical significance is calculated through unpaired t-test with Welch's correction.

46 We recently performed similar characterization for bone marrow derived MSC derived  
47 exosomes<sup>1</sup> and microvesicles<sup>2</sup>, and found that Calnexin marker can be used as one of the markers  
48 to distinguish between exosomes and microvesicles as well as XOs purity. Comparing the Western  
49 blotting results from MSC derived MVs and MSC derived exosomes<sup>1</sup> suggest that calnexin and  
50 CD81 may potentially be used to distinguish between exosomes and MVs. XOs were visualized  
51 and quantified using NTA analysis, where  $1.7 \times 10^{12} \pm 7.6 \times 10^{11}$  XOs/mL spherical particles with  
52 average diameter  $105 \pm 48$  nm were isolated from ~ 150 to 190 million cultured MSCs in 100%  
53 confluency (**Supplementary Figure 1c**). In developing methods to analyze XOs, we particularly  
54 sought to measure the expression of TGF $\beta$ -1 and PD-L1, as its expression on cancer cells XOs has  
55 been suggested to play a critical role in the immune evasion of tumor microenvironment<sup>3,4,5</sup>.

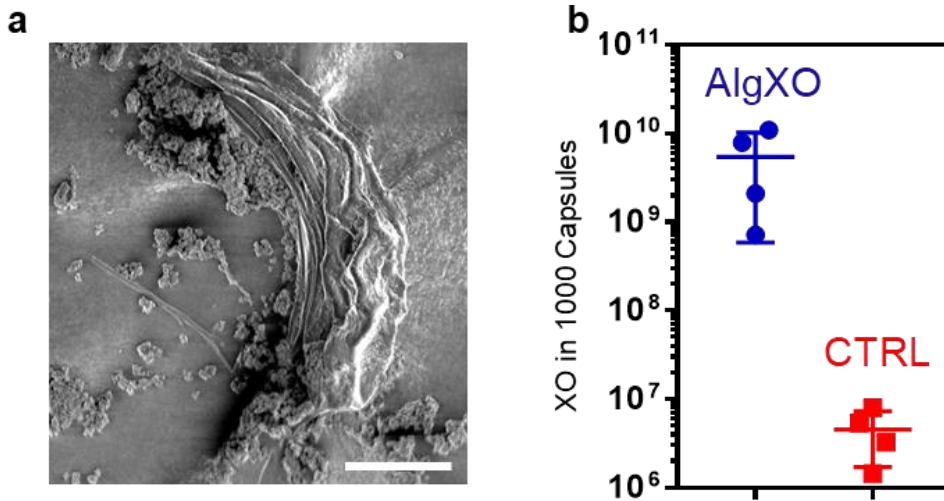

56

57 **Supplementary Figure 2. a)** Freeze-Fractured Scanning Electron Microscopy of an AlgXO microcapsule, showing the  
 58 encapsulated XOs within the microcapsules (Scale = 100  $\mu$ m). **b)** total number of exosome encapsulated within ~1000 AlgXO  
 59 microcapsules is  $5.43 \times 10^9 \pm 4.84 \times 10^9$  using NTA analysis. (n = 4 separate preparation)

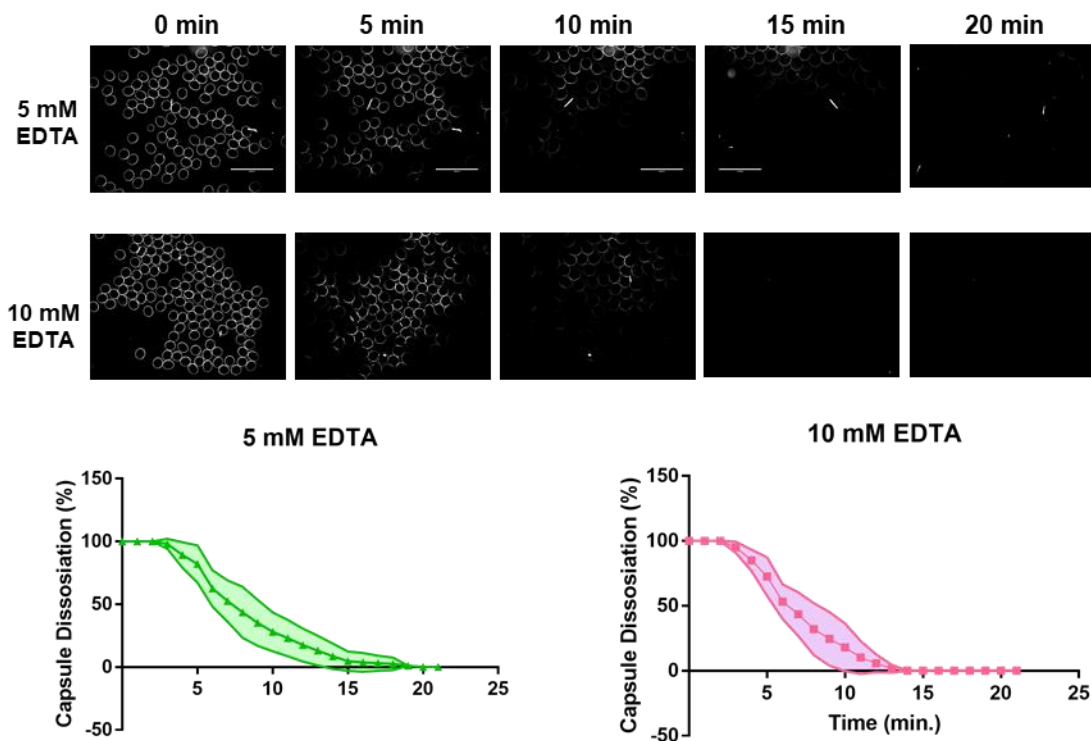

60

61 **Supplementary Figure 3. EDTA dissolves alginate microcapsules.** CTRL microcapsules (n = 100) were dissolved in 5 or 10  
 62 mM EDTA, and microscopic images were taken in 1 min intervals using EVOS imaging system microscope.

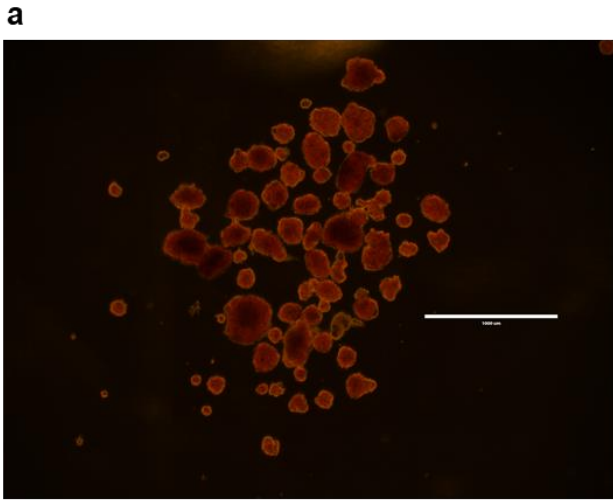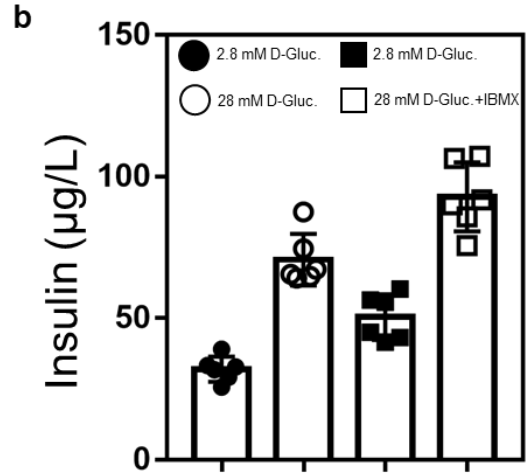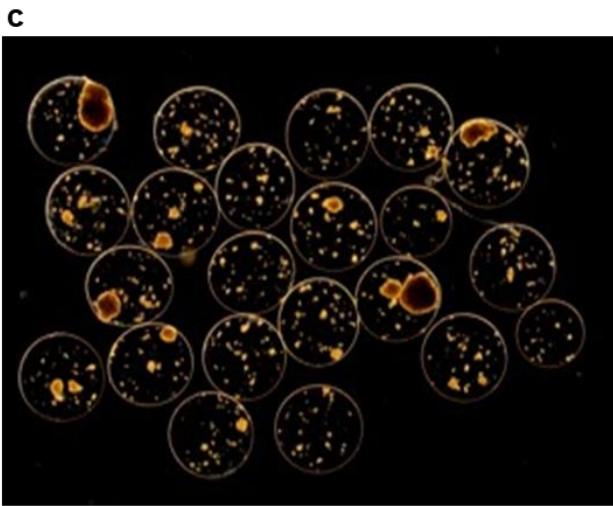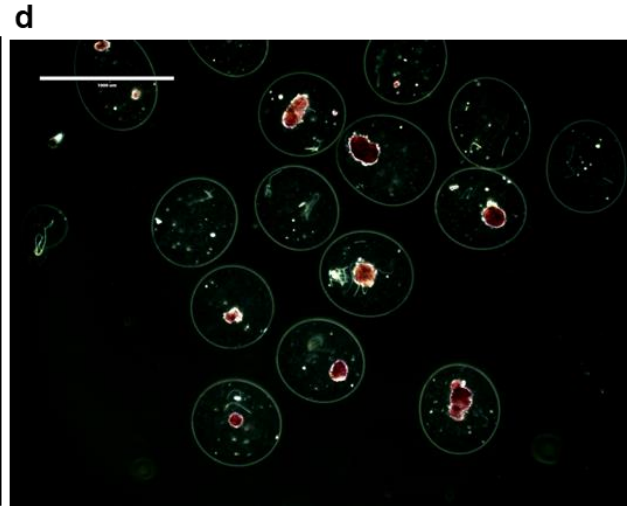

63

64 **Supplementary Figure 4. Islets quality control.** After each islet isolation, we ran quality control measurements. **a)** DTZ  
 65 staining to quantify the islet purity and count ( $947 \pm 137$  IEQ). **b)** Glucose Stimulation Insulin Release (GSIR) test is run to validate  
 66 the functionality of the isolated islets. Encapsulated **c)** CTRL microcapsules and **d)** AlgXO microcapsules

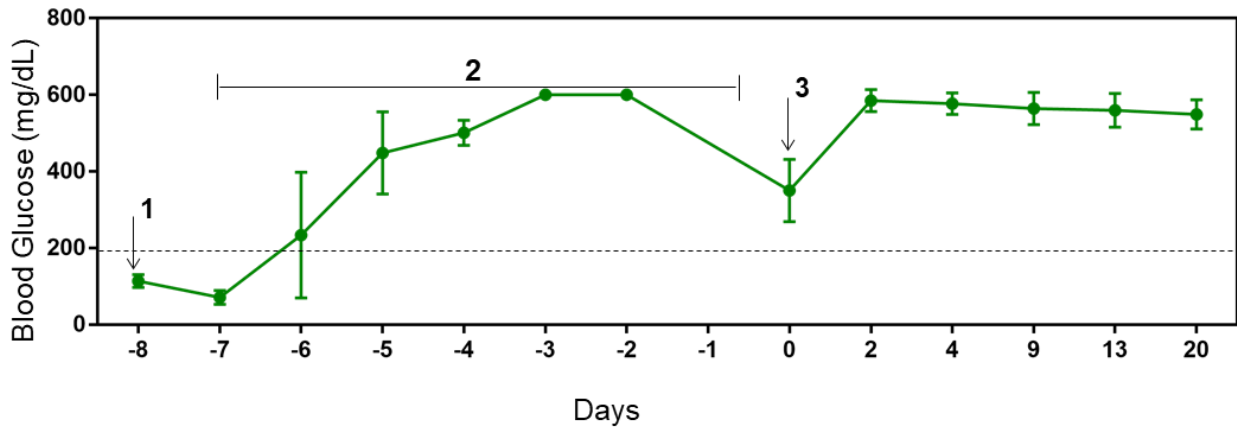

67

68 **Supplementary Figure 5. Transplantation of AlgXO microcapsules without islets failed to reverse hyperglycemia in STZ**  
 69 **mice.** Empty (without islets) AlgXO microcapsules could not reverse the hyperglycemia in diabetic mice.

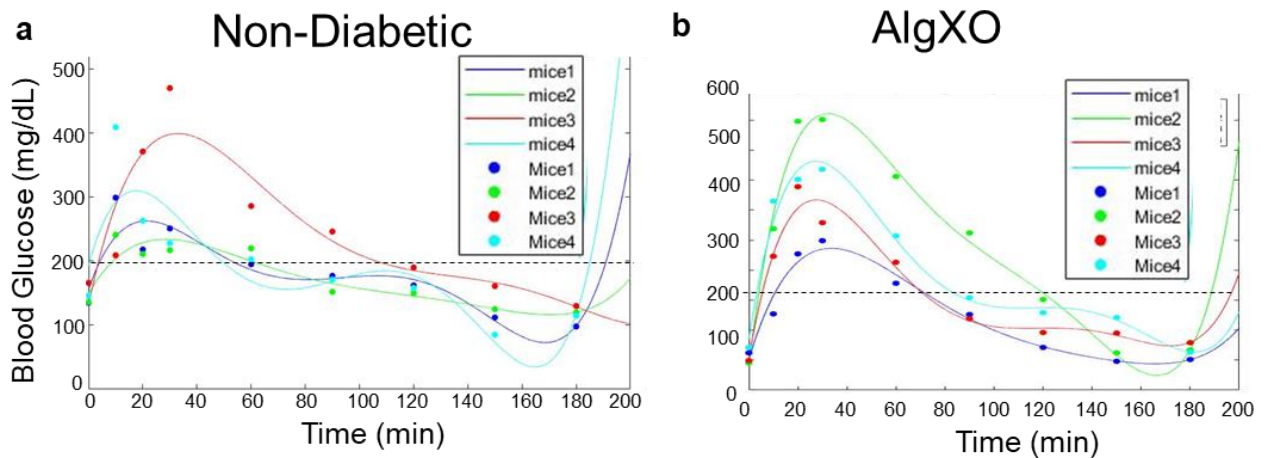

70

71 **Supplementary Figure 6. Polynomial regressions onto glucose challenge response.** a) Polynomials with degree 5 were assigned  
 72 to the OGTT curve for 4 representative mice of a non-diabetic group and b) AlgXO transplanted group (1500 IEQ). Small circles  
 73 show the raw OGTT data and lines represent the assigned polynomial. Dashed line demonstrates the normoglycemic criterion (i.e.  
 74 blood glucose < 200 mg/mL).

75

76 **Islet Dose Study**

77 Clinical trials for islet transplantation have shown that allogeneic or xenogeneic source of  
 78 islets affect the clinical efficacy, and have resulted in conflicting results. More specifically,  
 79 although xenotransplantation in non-immunosuppressed diabetic patients partially reduced

80 hypoglycemic events, higher doses of xenogeneic islets were less effective<sup>6,7</sup>. Results from this  
81 trial showed that the transplantation of 5000 IEQ/kg xeno-islets was associated with superior  
82 glycemic control and graft function compared to higher doses of xeno-islets (i.e. 15,000 or  
83 20,000 IEQ/kg). Interestingly, a recent auto-transplantation clinical trial demonstrated a strong  
84 dose-response relationship between the islet dose and graft function<sup>8</sup>. This trial suggested that the  
85 islet graft failure was 25-fold more likely in patients transplanted with low dose (< 2000 IEQ/kg)  
86 islets versus higher doses ( $\geq$  5000 IEQ/kg or more)<sup>8</sup>. We thus sought to understand whether such  
87 observations could be replicated in our pre-clinical diabetic mice model, and we found that the  
88 xeno-islet dose is a critical determinant of the transplant therapeutic efficacy. We used a low dose  
89 (500 IEQ) and a high dose (5000 IEQ) islets transplanted within AlgXO and CTRL microcapsules.  
90 Islets (5000 IEQ) within AlgXO reversed hyperglycemia for about 80 days but failed to do so in  
91 longer periods. Surprisingly, 5000 IEQ islets within the CTRL microcapsules were not able to  
92 consistently reverse the hyperglycemia in STZ mice (**Supplementary Figure 7a**). We further  
93 repeated the efficacy of AlgXO transplants in response to OGTT in the 5000 IEQ transplanted  
94 group and compared against non-diabetic control (**Supplementary Figure 7b**). Polynomials with  
95 degree 5 were assigned to the OGTT curve of every individual mice (**Supplementary Figure 7c**),  
96 and time to normoglycemia was calculated based on the value of 200 for the polynomial functions.  
97 **Supplementary Figure 7d** demonstrates that the average time to reach normoglycemia after an  
98 OGTT for mice with AlgXO transplants was  $112 \pm 32$  minutes. This suggest a delay in glucose  
99 response of mice received AlgXO transplants versus non-diabetic mice ( $p = 0.08$ ). In addition, 6  
100 out of 10 diabetic mice that received 5000 IEQ islets within CTRL microcapsules died within a  
101 day of transplantation, while this ratio was 1 out of 8 for AlgXO group (**Supplementary Figure**  
102 **7e**,  $p = 0.0018$ ). As a result, AlgXO microcapsules delayed the graft rejection and increased the

103 normoglycemic duration in mice transplanted with high dose islets (**Supplementary Figure 7f**);  
104 however, with less efficacy than medium dose of islets i.e. 1500 IEQ. We further tested lower dose  
105 of islets (500 IEQ), where neither the AlgXO nor the CTRL microcapsules were able to reverse  
106 hyperglycemia in the recipient mice (**Supplementary Figure 7g**).

107

108



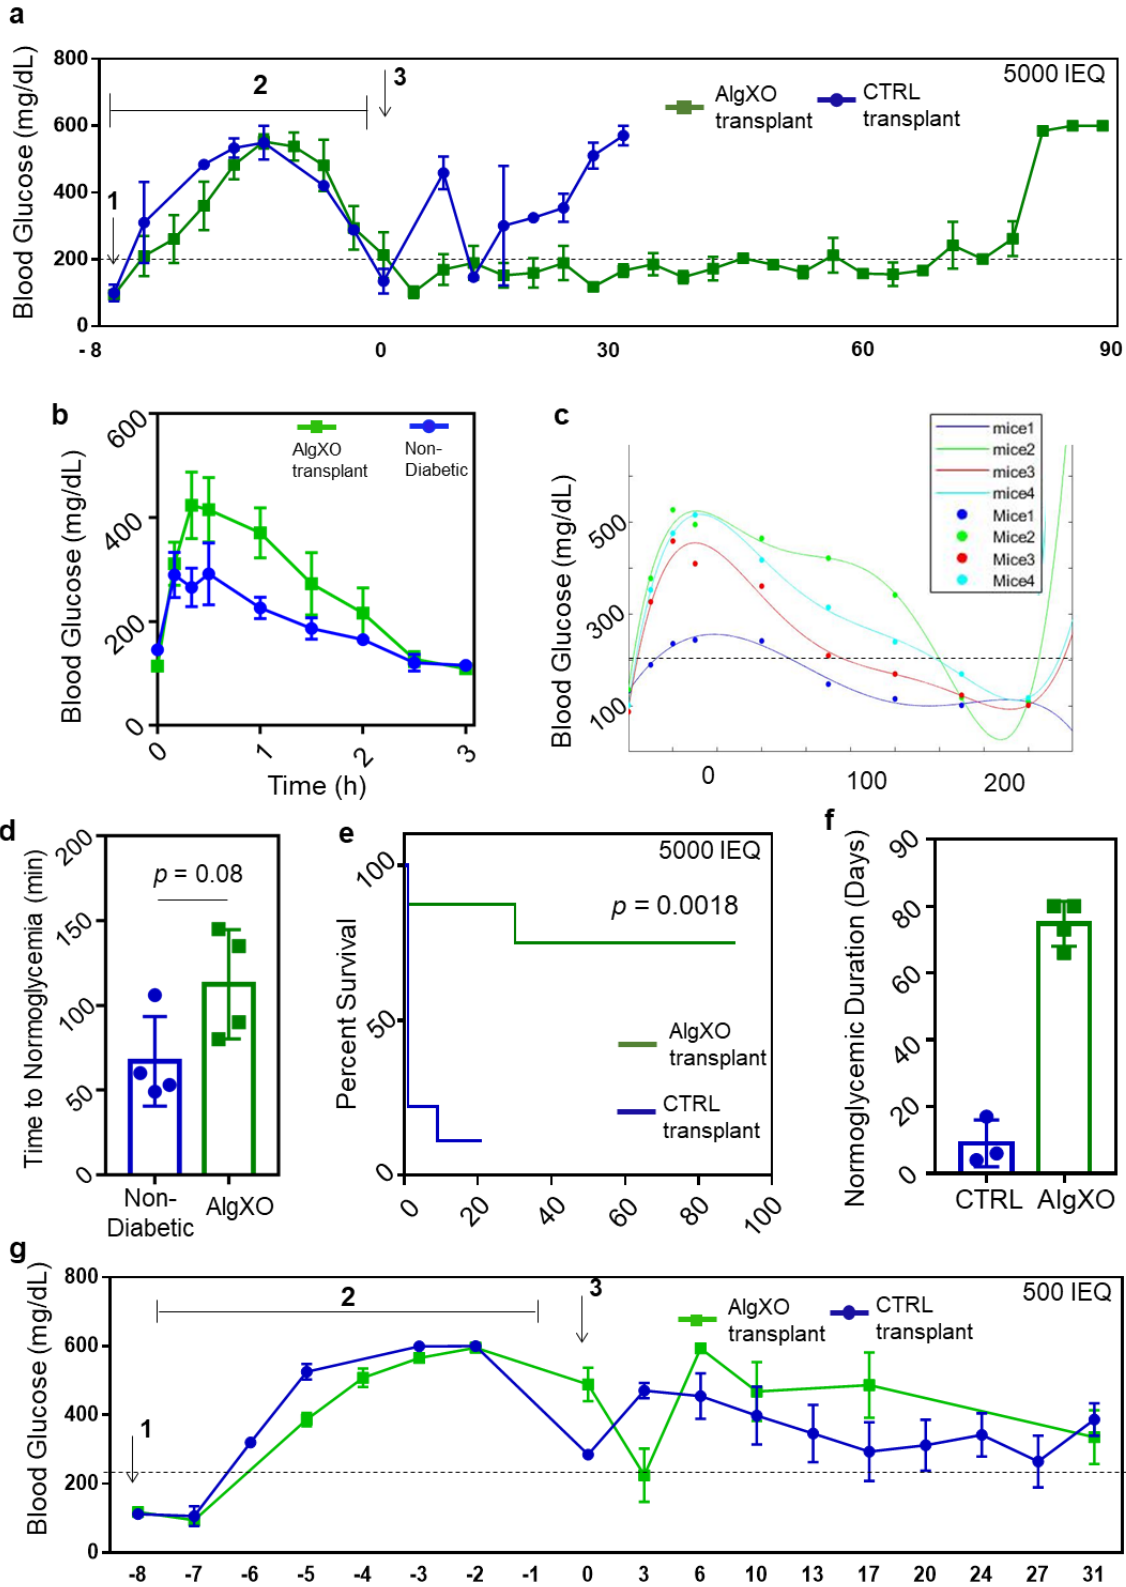

109

110 **Supplementary Figure 7. Dose study of islets xenotransplantation (i.e. 500 or 5000 IEQ islets) in immunocompetent STZ**  
 111 **mice. a)** In higher islet dosage (5000 IEQ), CTRL transplants failed to consistently reverse hyperglycemia in C57/BL6 STZ mice.

112 However, AlgXO transplants reversed hyperglycemia for ~ 80 days. **b)** We further tested the efficacy of AlgXO transplants in  
 113 response to oral glucose tolerance test (OGTT). One month after transplantation, AlgXO transplants successfully reversed  
 114 hyperglycemia event induced by glucose challenge with a similar trend as non-diabetic mice. **c)** Polynomials with degree 5 were  
 115 assigned to the OGTT curve of every individual mice and equations were solved to find the average time needed for the mice blood  
 116 glucose to reach 200 mg/dL after an OGTT. **d)** The average time to reach normoglycemia (i.e. 200 mg/dL) after an OGTT was  $112 \pm 32$   
 117 minutes for mice transplanted with 5000 IEQ islet encapsulated in AlgXO. The average time to reach normoglycemia for non-  
 118 diabetic mice was  $67 \pm 26$  minutes. This suggest a slight delay in glucose response of mice received AlgXO transplants versus non-  
 119 diabetic mice ( $p = 0.08$ ). **e)** Mice received CTRL transplants with 5000 IEQ islets had low survivals, where 6 of 10 mice died  
 120 within a day of transplantation, while only 1/7 mice receiving AlgXO transplants with 5000 IEQ islets died within one day of  
 121 transplantation and 5 others remained alive till the end of the study ( $p = 0.0018$ , Long-rank (Mantel-Cox) test). **f)** Mice that received  
 122 AlgXO transplants with 5000 IEQ islets remained normoglycemic for  $75 \pm 7$  days, while this duration for CTRL transplanted mice  
 123 was  $9 \pm 7$  days after transplantation. **g)** Lower dose islets (500 IEQ) was ineffective in euglycemic induction neither within CTRL  
 124 nor AlgXO microcapsules. On the diagram, 1 shows the STZ induction, 2 shows the time for diabetes progression, and 3 shows  
 125 the transplantation timepoints. Statistical significance is calculated through unpaired t-test with Welch's correction.

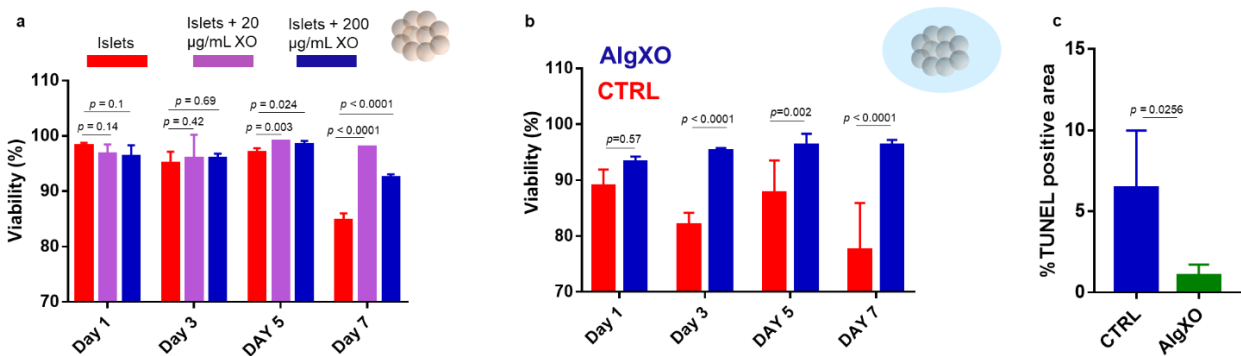

126 **Supplementary Figure 8. XOs enhance the viability of naked and encapsulated rat islets. a)** Addition of 20 µg/mL and 200  
 128 µg/mL XOs to the islet cultures significantly enhances the viability of islets after 5 and 7 days of culture. It should be noted that  
 129 viability was measured using Calcein AM (live cells) and propidium iodide (dead cells) staining. **b)** Starting from 3 days of islet  
 130 encapsulation, AlgXO enhances the viability of encapsulated islets within the first week of encapsulation. **c)** TUNEL assay  
 131 demonstrated that after 1 month of transplantation, the TUNEL positive area of islets transplanted within AlgXO ( $1.02\% \pm 0.32\%$ )  
 132 is higher ( $n = 5$ ,  $p = 0.0256$ ) compared to CTRL ( $6.44\% \pm 1.59\%$ ). Statistical significance is calculated through unpaired t-test  
 133 with Welch's correction.

134

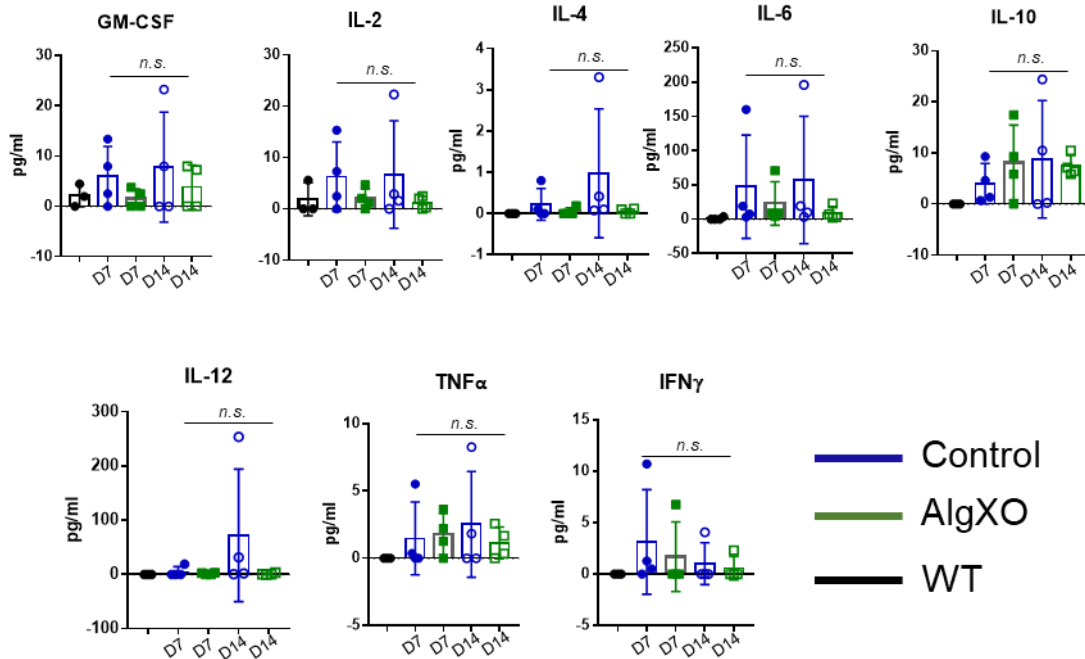

135

136 **Supplementary Figure 9.** Blood cytokines analyses of mice received AlgXO or CTRL microcapsules. Mice serum was harvested  
 137 from mice at days 7 and 14 after transplantation, showing no significant difference among groups. One-way ANOVA was  
 138 conducted to measure the statistical difference. Wild Type (WT) mice was also added to the groups as a negative control (n = 4,  
 139 statistical significance is calculated through unpaired t-test with Welch's correction).

140

### 141 **Immune Microenvironment Around Subcutaneous Microcapsules**

142 We found that total cell infiltration around microcapsules was significantly lower in  
 143 AlgXO fibrotic tissues ( $p = 0.011$ ). Similar trends were observed for CD68 ( $p = 0.037$ ) and MHCII  
 144 ( $p = 0.015$ ). In contrast, there was no association between CD206 expression ( $p = 0.112$ ). While  
 145 these observations suggest the less immune-infiltrated milieu in AlgXO fibrotic  
 146 microenvironment, the T cell sub population (CD3+) and fibrosis marker ( $\alpha$ SMA) were found to  
 147 be expressed more in AlgXO fibrotic microenvironment. These mixed outcomes were against our  
 148 initial hypothesis on the anti-inflammatory and/or anti-fibrotic response of AlgXO microcapsules  
 149 *in vivo*. In particular,  $\alpha$ SMA, which was highly expressed in the AlgXO microenvironment, is a  
 150 marker for activated myofibroblasts that are responsible for downstream collagen deposition and  
 151 fibrosis of implanted alginate microcapsules<sup>9</sup>. However,  $\alpha$ SMA is also a contractile protein

152 expressed in pericytes as well as in the vascular smooth muscle cells that surround arteries and  
 153 arterioles <sup>10</sup>. In the histological observations, the  $\alpha$ SMA cells were found to have a round structure  
 154 consistent with blood vessel structure (**Figure 2e**). Next, we quantified the blood vessel formation  
 155 and found that there is more blood vessel within the subcutaneous area (and around microcapsules)  
 156 of AlgXO 2-weeks explants (**Supplementary Figure 10a**). We further isolated cells from fibrotic  
 157 tissues and analyzed their subpopulation using flow cytometry. There was significantly higher  
 158 CD45+ cells (n = 4;  $p < 0.0001$ ) collected from AlgXO fibrotic tissues ( $33.1\% \pm 8.0\%$ ) compared  
 159 to control ( $83.0\% \pm 12.8\%$ ) (**Supplementary Figure 10b**). Tissue sections were further analyzed  
 160 for  $\alpha$ SMA showing vasculature presence in the AlgXO fibrotic microenvironment, demonstrating  
 161 a vascular-shaped microstructure (**Supplementary Figure 10c, d**). These results in their totality  
 162 suggest the presence of blood vasculature and less inflammatory milieu around AlgXO fibrotic  
 163 tissues.

164

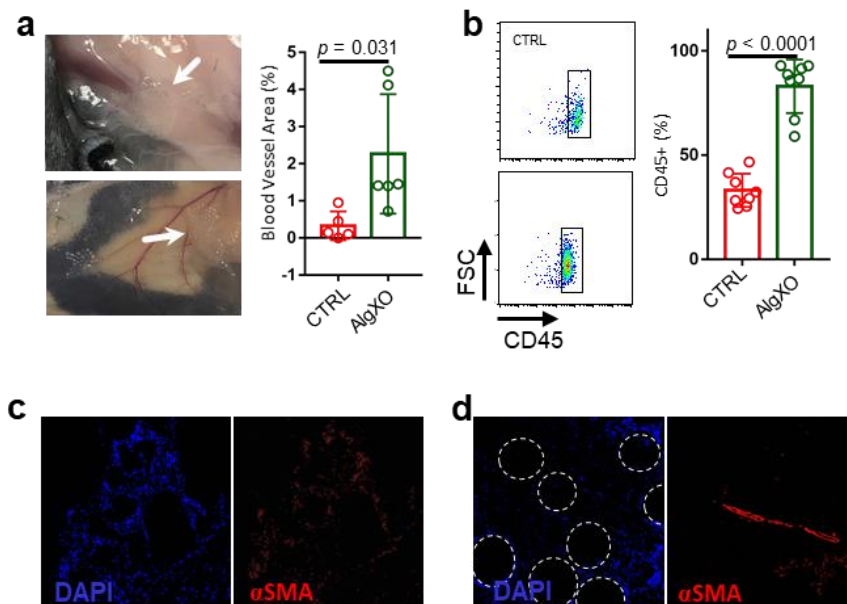

165

166 **Supplementary Figure 10. Vasculature present in the fibrotic tissue around AlgXO.** a) Pictures from subcutaneous explants  
 167 show presence of blood vessels in AlgXO fibrotic microenvironment. b) Flow cytometry analyses shows the presence of higher

168 CD45+ cells ( $p < 0.0001$ ) harvested from AlgXO fibrotic tissues ( $33.1\% \pm 8.0\%$ ) compared to control ( $83.0\% \pm 12.8\%$ ). **c**)  $\alpha$ SMA  
169 (markers of blood vessels) were absent in CTRL fibrotic tissues compared to **d**) AlgXO. Statistical significance is calculated  
170 through unpaired t-test with Welch's correction.

171

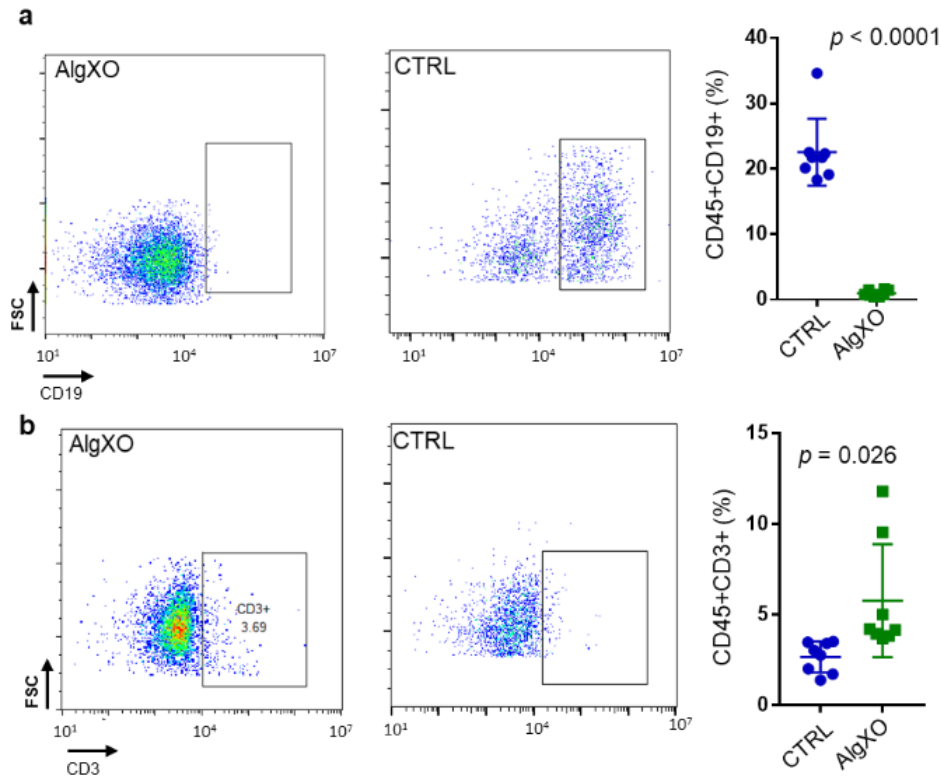

172

173 **Supplementary Figure 11.** The percentage of **a**) B and **b**) T cells presence in the fibrotic Tissues around AlgXO and CTRL. ( $n =$   
174 4). Statistical significance is calculated through unpaired t-test with Welch's correction.

175

176 We pursued the experiments to further investigate the anti-inflammatory properties of  
177 AlgXO microcapsules. Immune infiltration could be characterized with cell types present in the  
178 lavage around the inflamed area, particularly for biomaterials-based inflammation<sup>11, 12</sup>. Live cells  
179 within the subcutaneous lavage were first analyzed for common lymphocyte marker (CD45).  
180 **Supplementary Figure 12a, b** shows the percentage of CD45+ cells in lavage of CTRL implanted  
181 mice were  $41.6\% \pm 4.2\%$  and in the AlgXO implanted were  $8.5\% \pm 5.2\%$  ( $n = 4, p < 0.0001$ ). Sub-  
182 gating on CD45+ cells, the percentage of CD11b+ cells decreased from  $68.4\% \pm 9.4\%$  for CTRL

183 to 17.6% ± 13.4% for AlgXO microcapsules ( $p < 0.0001$ ). Around 68.2% ± 9.5% of CD11b+ cells  
184 are also expressing MHCII for CTRL, while this percentage is 23.5% ± 16.3% for AlgXO  
185 microcapsules ( $p < 0.0001$ ). Interestingly, there was no detectable CD45+CD11b+MHCII-  
186 CD206+ (M2-like macrophages <sup>13</sup>) for CTRL, while these macrophages 3.7% ± 1.9% for lavage  
187 retrieved from the surrounding environment of AlgXO microcapsules ( $p < 0.0001$ ).

188 To gain a more holistic information on the lavage immune-profile, we compared the lavage  
189 components of both microcapsules at the cellular level through tSNE representation.  
190 **Supplementary Figure 12c, d** show tSNE plots and two sub-populations that were analyzed for  
191 immune markers. Query 1 (gated on specific sub population present in CTRL but not in AlgXO)  
192 was CD45+CD11b+CD3-CD19-MHCII-Ly6C-Ly6G-, which is likely to be non-activated  
193 dendritic cells <sup>14</sup>. Query 2 (gated on specific sub population present in AlgXO but not in CTRL)  
194 showed the subpopulation of cells with CD45-CD11b-CD3-CD19-MHCII-Ly6C-Ly6G- markers,  
195 which are likely to be from neither myeloid nor lymphoid origin. These results in their totality  
196 supports the reduced-inflammatory response against AlgXO implants, while non-inflammatory  
197 tissues were formed around AlgXO. It should be noted that transplantation of 1500 IEQ rat islets  
198 within AlgXO or CTRL failed to regulate the dysglycemia when transplanted subcutaneously  
199 (**Supplementary Figure 13**). Interestingly, while 1500 IEQ islets regulated mice hyperglycemia  
200 when transplanted intraperitoneally, subcutaneous transplantation failed to do so. A combination  
201 of stronger fibrotic response, lack of moveability, and more hypoxic environment in the  
202 subcutaneous area are likely among the reasons for such a difference.

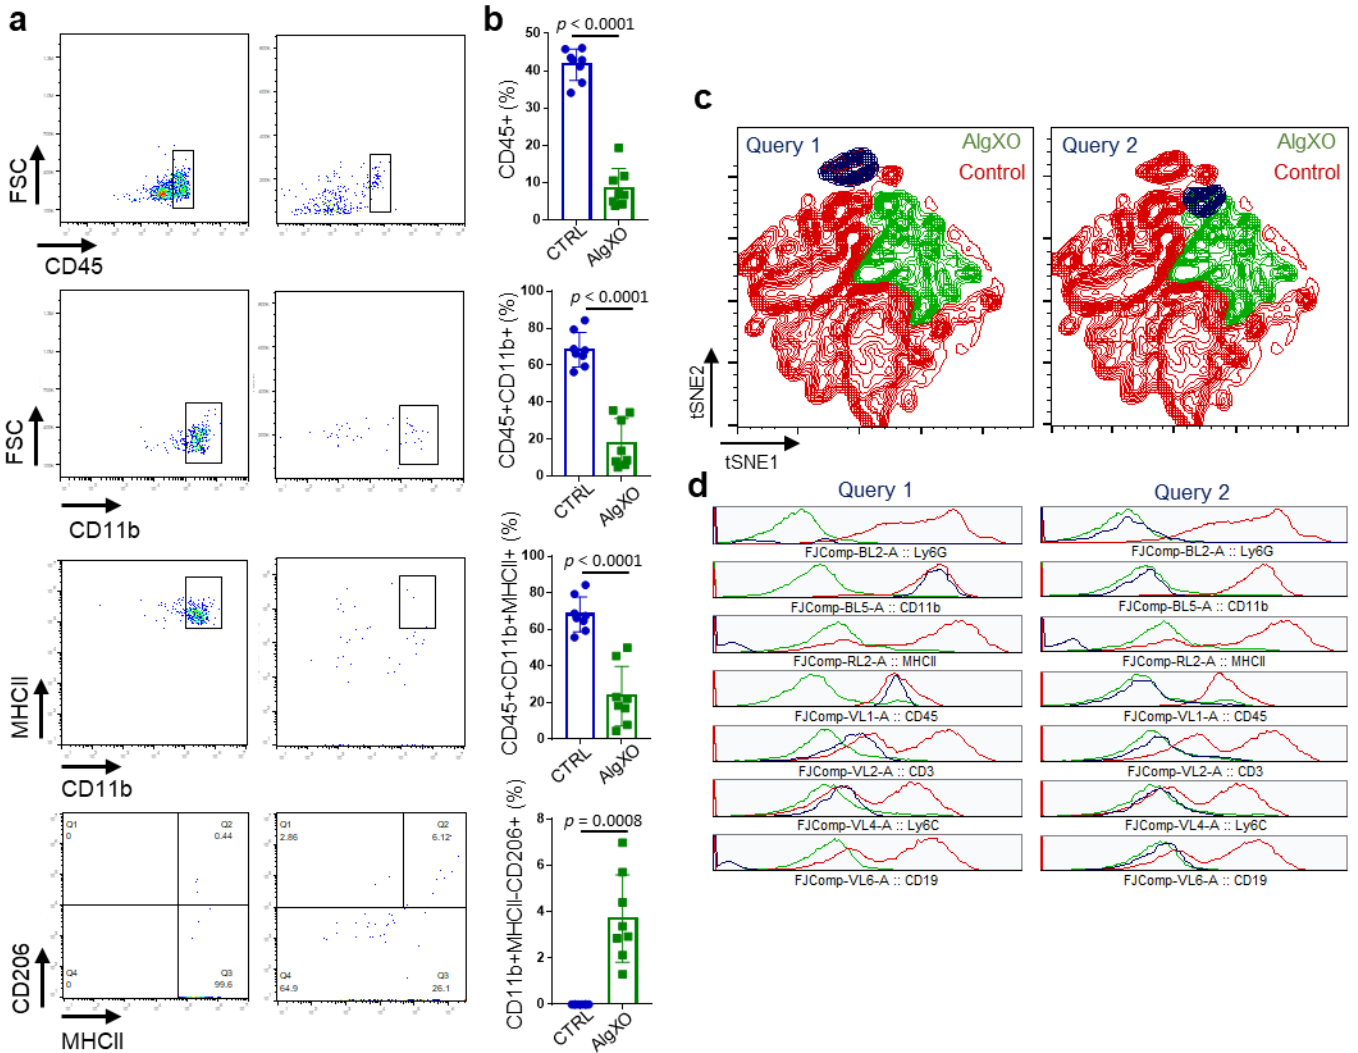

203

204 **Supplementary Figure 12. Flow cytometry analyses of lavage around microcapsules show distinct immunocytes population**

205 **around AlgXO and CTRL microcapsules. a, b)** Flow cytometry analyses demonstrates the total CD45+ population present  
 206 around AlgXO is less than CTRL microcapsules. Similar trend was observed for CD11b+, CD11b+MHCII+, and CD11b+MHCII-  
 207 CD206+ sub-populations. **c)** tSNE plots demonstrates the different cell environment present in the lavage collected from  
 208 surrounding non/low adherent cells around AlgXO and CTRL explants. **d)** Two sub-populations were then analyzed for immune  
 209 markers. Cells in Query 1 (gated on specific sub population present in CTRL but not in AlgXO) was CD45+CD11b+CD3-CD19-  
 210 MHCII-Ly6C-Ly6G-, which is likely to be dendritic cells. Cells in Query 2 (gated on specific sub population present in AlgXO  
 211 but not in CTRL) was CD45-CD11b-CD3-CD19-MHCII-Ly6C-Ly6G-, which is likely to be neither from myeloid or lymphoid  
 212 origin. (n = 4, statistical significance is calculated through unpaired t-test with Welch's correction)

213

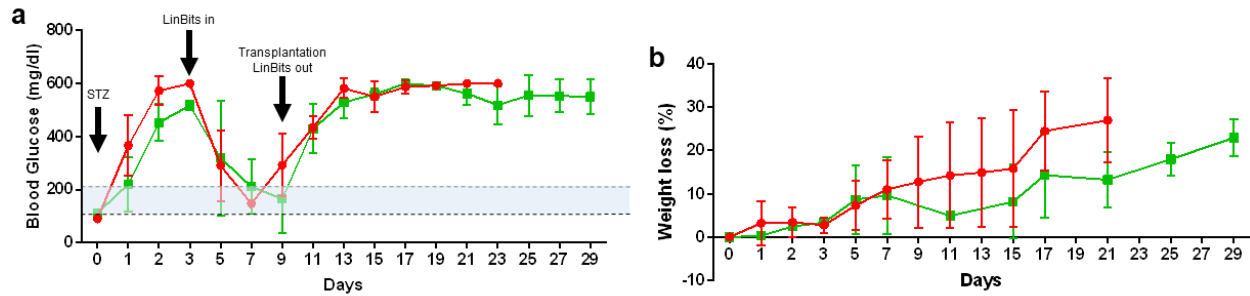

214

215 **Supplementary Figure 13. Subcutaneous transplantation of islets encapsulated in either CTRL and AlgXO.** The a) glucose  
 216 and b) body weights of STZed mice were tracked for a month, and there was no significant improvement in the glycemetic control  
 217 in any of the groups.

218

### 219 **Simulation of release model for nanoparticle**

220 To better understand the spatiotemporal profiles for the controlled release of XOs from  
 221 AlgXO, we simulated such release using a MATLAB code. Simulations were run for homogenous  
 222 spatially distributed XOs within AlgXO with diameter of 300  $\mu\text{m}$ . Due to the 50-150 nm size  
 223 distribution of XOs, we run the simulation with 50, 100, and 150 nm nanoparticle size. To further  
 224 validate and characterize the release profiles other sizes (i.e. 10, 200, and 500 nm) were also tested  
 225 in our simulation model. The 2.5% (weight/volume) alginate was used in our experimental studies,  
 226 thus, we used the same percentage for the porosity of alginate calculations (equation 1):

#### 227 Modeling assumptions

##### 228 1. *Microcapsule size and porosity*

229 Simulations were run for uniformly sized and spatially distributed microcapsules and  
 230 diameter was assumed to be 300  $\mu\text{m}$ . Value of 2% (weight /volume) is evaluated as the default  
 231 value for all simulations. Porosity of alginate solid is calculated by equation 1.

232 
$$\text{porosity} = \frac{\rho_1 - \rho_2}{\rho_1 - \rho_3} \quad (1)$$



233  $\rho_1$  is particle density,  $\rho_2$  is bulk density, and  $\rho_3$  is fluid density. For alginate solid, particle density  
234 is 1.6 g/ml, fluid density is density of water, which is 1g/ml. Bulk density will be based on the  
235 concentration of alginate, which is shown in equation 2.

$$236 \quad \rho_2 = \frac{100 + C_{alg}}{100} \quad (2)$$

237

## 238 2. *Surrounding media*

239 Assuming that capsules are implanted and surrounded by physiological fluid, surrounding  
240 viscosity was chosen to be  $3.5 \cdot 10^{-3}$  Pa\*s.

## 241 3. *Temperature*

242 Assuming the capsule are implanted, temperature of microcapsule and surrounding  
243 environment should be close to body temperature, which is 37 degree.

## 244 4. *XOs concentration*

245 XOs are homogeneously mixed inside the microcapsules, with an initial concentration of  
246 10 particles/ $\mu\text{m}^3$ .

## 247 5. *XOs size*

248 XOs are generally recognized to be between 30-150 nm. Thus, we set up the particle  
249 diameter as 10 nm, 50 nm, 100 nm, 200 nm, and 500 nm to see the different result as  
250 particle size changes. Particles larger than 450 nm cannot diffuse out from the capsule [18].

251

## 252 6. *Diffusion model*

253 To simplify our modeling, we just assumed that XOs diffuse out of microcapsules based  
254 on gradient density differences. We also assumed that a uniformed sphere symmetrically

255 diffuses out in any direction. Thus, we established a 1-dimensional diffusion model for  
256 XOs.

257

## 258 Mathematical model assumptions

### 259 1. *1-D diffusion equation*

260 We are using heat equation to calculate the 1-dimensional diffusion of nanoparticles. Heat  
261 equation is a partial differential equation as shown in equation 3.

$$262 \quad \frac{\partial C}{\partial t} = D * \frac{\partial^2 C}{\partial x^2} \quad (3)$$

263 C is concentration gradient, t is time, and x is distance from center of the capsule. D is  
264 diffusion coefficient of XOs at certain position.

265

### 266 2. *Diffusion coefficient outside the microcapsule*

267 To determine diffusion coefficient outside the capsule, we use Stroke-Einstein equation  
268 (equation 4).

$$269 \quad D = \frac{R}{N_A} * \frac{T}{6 * \pi * \eta * r} \quad (4)$$

270 Where R is gas constant, NA is Avogadro constant, T is temperature in kelvin,  $\eta$  is viscosity  
271 of solution, and r is radius of XOs.

272

### 273 3. *Effective diffusion coefficient inside the capsule*

274 Effective diffusion coefficient inside a porous media is largely based on porosity and  
275 tortuosity of media. Generally, effective diffusion coefficient can be calculated based on  
276 equation 5.

$$277 \quad D_{eff} = D * \frac{porosity}{tortuosity} \quad (5)$$

278 For porous media, normally we have a relationship between porosity and tortuosity, which  
279 is shown in equation 6.

$$280 \quad \text{tortuosity} = \text{porosity}^{-\frac{1}{3}} \quad (6)$$

281

282 Since the microcapsule diameter is  $\sim 150 \mu\text{m}$ , the program will simulate concentration  
283 gradient from 0 to  $500 \mu\text{m}$ . A 600 s run time was selected to visualize the concentration change  
284 inside the area. Diffusion of nanoparticle for 10 nm, 50 nm, 100 nm, 200 nm, and 500 nm is  
285 plotted (**Figure 3h**). As shown in the graph, nanoparticles with smaller diameter diffuse faster than  
286 which with larger diameter (**Supplementary Figure 14**). Particle with 500 nm diameter cannot  
287 diffuse out of the capsule. For particles with size of 10 nm, within 600 s, concentration of particles  
288 at center of the capsule will drop to 40% of initial concentration. For 50 nm nanoparticles,  
289 concentration at center of the capsule will drop to 80% of initial value. For 100 and 200 nm, there  
290 is no significant drop of concentration at center of the microcapsule. Concentration of nanoparticle  
291 outside the capsule also depends on particle size. For 10 nm nanoparticle, after 600 s, concentration  
292 of nanoparticle outside the capsule will larger than  $15 \text{ particles}/\mu\text{m}^3$ . For 50nm, 100nm, and  
293 200nm, there is not enough nanoparticles  $350 \mu\text{m}$  from center of the capsule (concentration  $< 1$   
294  $\text{particle}/\mu\text{m}^3$ ).

295

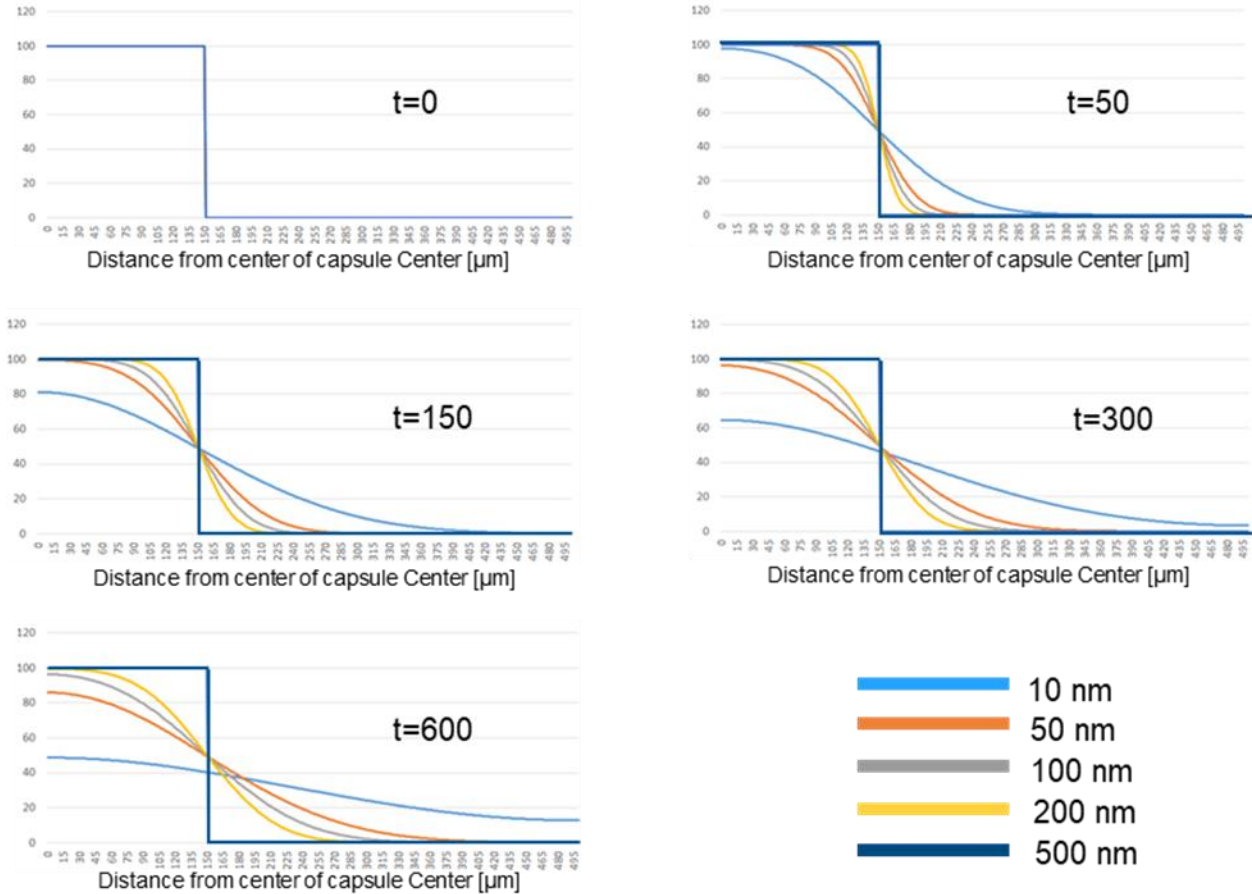

296

297 **Supplementary Figure 14. Simulated controlled release of particles with 10, 50, 100, 200, or 500 nm of diameters.** At  $t > 0$ ,  
 298 particles with diameter  $\leq 200$  nm show diffusion profiles, where smaller particles diffuse faster. Particles with diameter of 500  
 299 nm do not show diffusion out of microcapsules at least for 600 s.

300

301 Through our high-throughput cytokine assay, we found that XOs significantly reduce the  
 302 production of G-CSF,  $\text{IFN}\gamma$ , LIF, KC, MIP-2, RANTES, IL-6, LIX, and VEGF from LPS  
 303 stimulated macrophages (**Figure 4e**). These cytokines and chemokines are hallmarks of  $\text{NF}\kappa\text{B}$   
 304 inflammatory pathway, suggesting that XOs likely possess anti-inflammatory properties through  
 305 regulating this pathway. These cytokines could have complementary effects. For example,  
 306 chemotactic signals include CXC chemokines such as CXCL1/KC, CXCL2/MIP-2, and  
 307 CXCL5/LIX, and CXCL8/IL-8, which are potent chemoattractant for NGs and their increased

308 production causes neutrophil granulocytes infiltration and extravasation <sup>15</sup>. **Supplementary Table**  
 309 **1** summarizes the function of these cytokines and their relation to NFκB pathway.

310

311 **Supplementary Table 1. Macrophages Cytokines Influenced by XOs**

| Chemokine/<br>Cytokine | Function                                                                                                                                                                                                                                                                                                                                                                                                                                                           | Ref.          |
|------------------------|--------------------------------------------------------------------------------------------------------------------------------------------------------------------------------------------------------------------------------------------------------------------------------------------------------------------------------------------------------------------------------------------------------------------------------------------------------------------|---------------|
| G-CSF/<br>CSF3         | <ul style="list-style-type: none"> <li>• Regulates the survival, maturation, and proliferation of neutrophil progenitors</li> <li>• Regulates the differentiation of granulocyte lineages</li> <li>• Regulates neutrophils mobilization from bone marrow to peripheral tissues</li> <li>• LPS-activated ERK2 functions by remodeling local chromatin, interacting with C/EBPβ and synergizing its transactivation activity to increase G-CSF expression</li> </ul> | 16, 17        |
| IFNγ                   | <ul style="list-style-type: none"> <li>• The only known type II interferon</li> <li>• Upon binding to receptor, JAK1 and JAK2 are activated and phosphorylate STAT1</li> <li>• Macrophages secrete upon stimulation with LPS</li> </ul>                                                                                                                                                                                                                            | 18, 19        |
| LIF                    | <ul style="list-style-type: none"> <li>• LIF acts in an autocrine manner via LIF receptor to promote STAT4 activation. Activated STAT4 together with NF-κB/p65-p52 and C/EBPβ enhances IL-6 transcription</li> </ul>                                                                                                                                                                                                                                               | 20            |
| MIP-2/<br>CXCL2        | <ul style="list-style-type: none"> <li>• Important chemokine for recruitment of neutrophils</li> <li>• NF-κB activation is required for MIP-2 gene expression in the LPS-signaling pathway A MIP-2 promoter could be activated by ectopical expression of NF-κB p65 or c-Jun transcription factors.</li> </ul>                                                                                                                                                     | 21            |
| RANTES                 | <ul style="list-style-type: none"> <li>• Secretes via LPS-induced NF-κB activation in monocytes through sterile α and HEAT/Armadillo motif-containing protein (SARM)toll/IL-1R domain-containing adaptor. SARM is critical for the recruitment of transcription factors and of RNA polymerase II to the Ccl5 promoter</li> </ul>                                                                                                                                   | 22, 23        |
| LIX/<br>CXCL5          | <ul style="list-style-type: none"> <li>• Important chemokine in Neutrophil trafficking</li> </ul>                                                                                                                                                                                                                                                                                                                                                                  | 24,<br>25, 26 |

|                      |                                                                                                                                                                                                                                                                                                      |               |
|----------------------|------------------------------------------------------------------------------------------------------------------------------------------------------------------------------------------------------------------------------------------------------------------------------------------------------|---------------|
| <p>KC/<br/>CXCL1</p> | <ul style="list-style-type: none"> <li>• CXCL1 is regulated through interactions of NF-<math>\kappa</math>B with other transcriptional regulatory molecules such as poly(ADP-ribose) polymerase-1 (PARP-1) and cAMP response element binding protein (CREB)-binding protein</li> </ul>               | <p>27, 28</p> |
| <p>VEGF</p>          | <ul style="list-style-type: none"> <li>• Important protein for angiogenesis</li> <li>• VEGF production in human macrophages is NF-<math>\kappa</math>B dependent and could be significantly reduced using the NF-<math>\kappa</math>B inhibitor, I<math>\kappa</math>B<math>\alpha</math></li> </ul> | <p>29</p>     |

312

313

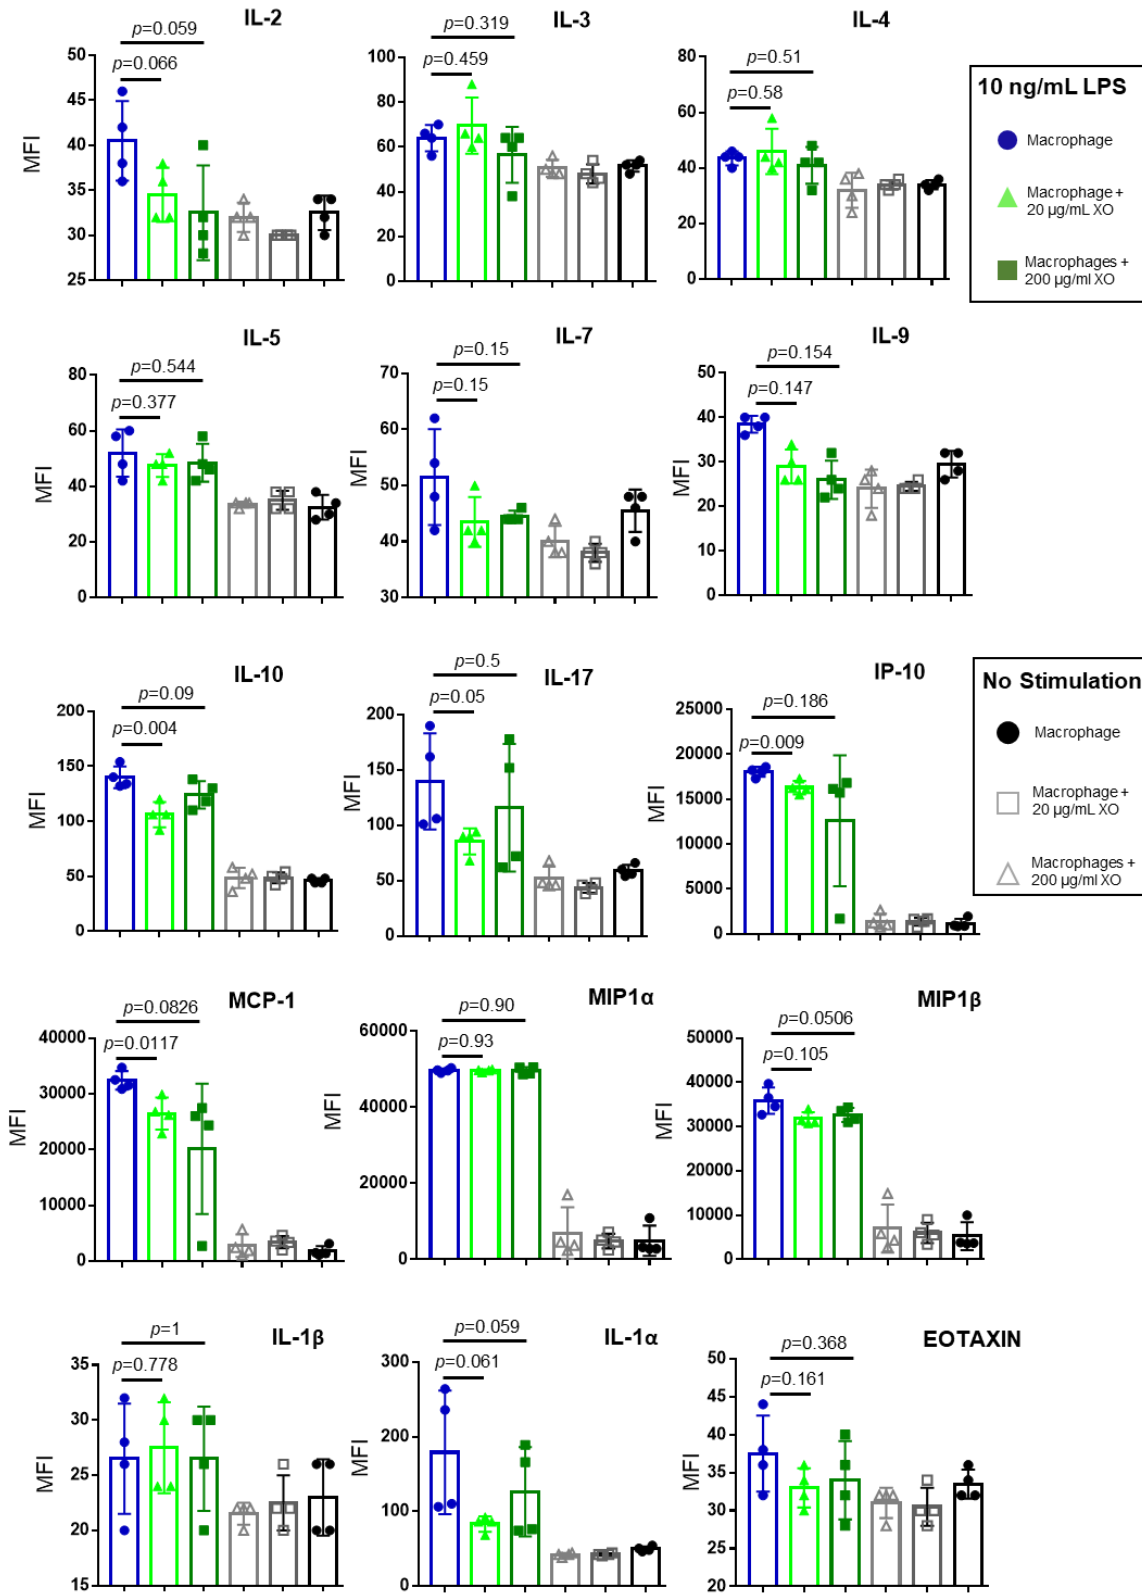

314

315 **Supplementary Figure 15. XOs effect on the production of cytokines from 10 ng/mL LPS (TLR4 agonist) stimulated**

316 **macrophages.** Statistical significance is calculated through unpaired t-test with Welch's correction (n = 4).

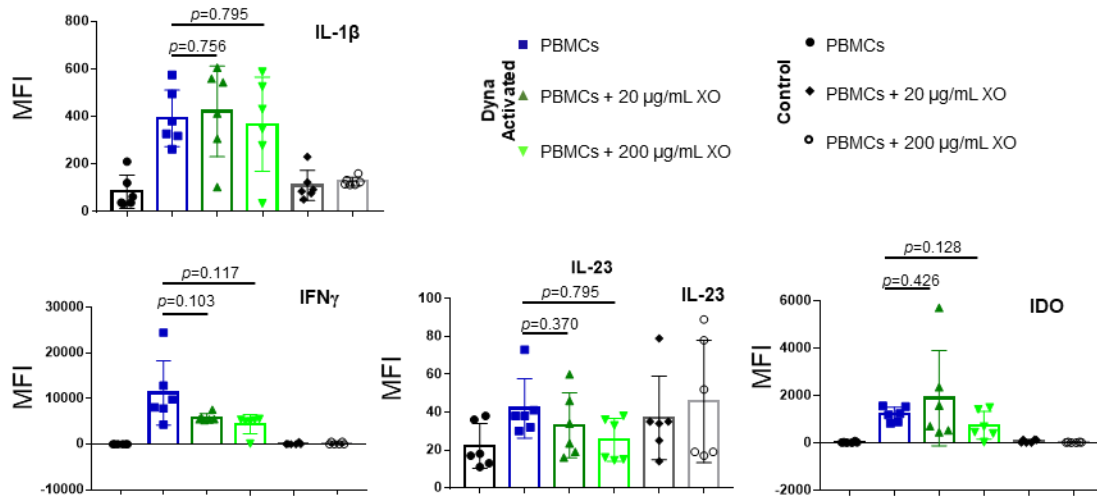

317

318 **Supplementary Figure 16. Cytokines analyses from co-cultures of human activated PBMCs.** PBMCs were activated with  
 319 bead-bound CD3/CD28 antibodies in the presence and absence of XOs. XOs in both 20 and 200  $\mu\text{g/mL}$  concentrations slightly  
 320 influenced the production of IL-1 $\beta$ , IL-23, IFN $\gamma$ , and IDO ( $n = 4$ ). Statistical significance is calculated through unpaired t-test  
 321 with Welch's correction.

322



323 **References**

324

- 325 1. Riazifar M, *et al.* Stem Cell-Derived Exosomes as Nanotherapeutics for Autoimmune and  
326 Neurodegenerative Disorders. *ACS Nano* **13**, 6670-6688 (2019).  
327
- 328 2. Mohammadi MR, *et al.* Isolation and characterization of microvesicles from mesenchymal stem cells.  
329 *Methods*, (2019).  
330
- 331 3. Daassi D, Mahoney KM, Freeman GJ. The importance of exosomal PDL1 in tumour immune evasion.  
332 *Nature Reviews Immunology*, (2020).  
333
- 334 4. Chen G, *et al.* Exosomal PD-L1 contributes to immunosuppression and is associated with anti-PD-1  
335 response. *Nature* **560**, 382-386 (2018).  
336
- 337 5. Haderk F, *et al.* Tumor-derived exosomes modulate PD-L1 expression in monocytes. *Science Immunology*  
338 **2**, eaah5509 (2017).  
339
- 340 6. Matsumoto S, *et al.* Clinical Porcine Islet Xenotransplantation Under Comprehensive Regulation.  
341 *Transplantation Proceedings* **46**, 1992-1995 (2014).  
342
- 343 7. Ekser B, Bottino R, Cooper DKC. Clinical Islet Xenotransplantation: A Step Forward. *EBioMedicine* **12**,  
344 22-23 (2016).  
345
- 346 8. Chinnakotla S, *et al.* Factors Predicting Outcomes After a Total Pancreatectomy and Islet  
347 Autotransplantation Lessons Learned From Over 500 Cases. *Annals of Surgery* **262**, 610–622 (2015).  
348
- 349 9. Doloff JC, *et al.* Colony stimulating factor-1 receptor is a central component of the foreign body response  
350 to biomaterial implants in rodents and non-human primates. *Nature Materials* **16**, 671 (2017).  
351
- 352 10. Kornfield TE, Newman EA. Regulation of Blood Flow in the Retinal Trilaminar Vascular Network. *The*  
353 *Journal of Neuroscience* **34**, 11504 (2014).  
354
- 355 11. Vegas AJ, *et al.* Combinatorial hydrogel library enables identification of materials that mitigate the foreign  
356 body response in primates. *Nature Biotechnology* **34**, 345 (2016).  
357
- 358 12. Vegas AJ, *et al.* Long-term glycemic control using polymer-encapsulated human stem cell-derived beta  
359 cells in immune-competent mice. *Nature Medicine* **22**, 306-311 (2016).  
360
- 361 13. Vlahos AE, Cober N, Sefton MV. Modular tissue engineering for the vascularization of subcutaneously  
362 transplanted pancreatic islets. *Proceedings of the National Academy of Sciences* **114**, 9337–9342 (2017).  
363
- 364 14. Hey Y-Y, Tan JKH, O'Neill HC. Redefining Myeloid Cell Subsets in Murine Spleen. *Front Immunol* **6**,  
365 652 (2016).  
366
- 367 15. Amanzada A, Moriconi F, Mansuroglu T, Cameron S, Ramadori G, A Malik I. Induction of chemokines  
368 and cytokines before neutrophils and macrophage recruitment in different regions of rat liver after TAA  
369 administration. *Laboratory Investigation* **94**, 235-247 (2014).  
370
- 371 16. Lieschke GJ, *et al.* Mice lacking granulocyte colony-stimulating factor have chronic neutropenia,  
372 granulocyte and macrophage progenitor cell deficiency, and impaired neutrophil mobilization. *Blood* **84**,  
373 1737-1746 (1994).  
374

- 375 17. Chang S-F, Lin S-S, Yang H-C, Chou Y-Y, Gao J-I, Lu S-C. LPS-Induced G-CSF Expression in  
376 Macrophages Is Mediated by ERK2, but Not ERK1. *PLOS ONE* **10**, e0129685 (2015).  
377
- 378 18. Fultz MJ, Barber SA, Dieffenbach CW, Vogel SN. Induction of IFN- $\gamma$  in macrophages by  
379 lipopolysaccharide. *International Immunology* **5**, 1383-1392 (1993).  
380
- 381 19. Plataniias LC. Mechanisms of type-I- and type-II-interferon-mediated signalling. *Nature Reviews*  
382 *Immunology* **5**, 375-386 (2005).  
383
- 384 20. Nguyen HN, *et al.* Autocrine Loop Involving IL-6 Family Member LIF, LIF Receptor, and STAT4 Drives  
385 Sustained Fibroblast Production of Inflammatory Mediators. *Immunity* **46**, 220-232 (2017).  
386
- 387 21. Kim D-S, Ho Han J, Kwon H-J. NF- $\kappa$ B and c-Jun-dependent regulation of macrophage inflammatory  
388 protein-2 gene expression in response to lipopolysaccharide in RAW 264.7 cells. *Molecular Immunology*  
389 **40**, 633-643 (2003).  
390
- 391 22. Karlsen A, *et al.* Anthocyanins Inhibit Nuclear Factor- $\kappa$ B Activation in Monocytes and Reduce Plasma  
392 Concentrations of Pro-Inflammatory Mediators in Healthy Adults. *The Journal of Nutrition* **137**, 1951-1954  
393 (2007).  
394
- 395 23. Gürtler C, *et al.* SARM Regulates CCL5 Production in Macrophages by Promoting the Recruitment of  
396 Transcription Factors and RNA Polymerase II to the  $\kappa$ Ccl5 Promoter. *The Journal of*  
397 *Immunology* **192**, 4821 (2014).  
398
- 399 24. Lin M, Carlson E, Diaconu E, Pearlman E. CXCL1/KC and CXCL5/LIX are selectively produced by  
400 corneal fibroblasts and mediate neutrophil infiltration to the corneal stroma in LPS keratitis. *Journal of*  
401 *leukocyte biology* **81**, 786-792 (2007).  
402
- 403 25. Wang L-Y, Tu Y-F, Lin Y-C, Huang C-C. CXCL5 signaling is a shared pathway of neuroinflammation and  
404 blood-brain barrier injury contributing to white matter injury in the immature brain. *J Neuroinflammation*  
405 **13**, 6-6 (2016).  
406
- 407 26. Chandrasekar B, *et al.* Chemokine-Cytokine Cross-talk THE ELR+ CXC CHEMOKINE LIX (CXCL5)  
408 AMPLIFIES A PROINFLAMMATORY CYTOKINE RESPONSE VIA A PHOSPHATIDYLINOSITOL  
409 3-KINASE-NF- $\kappa$ B PATHWAY. *Journal of Biological Chemistry* **278**, 4675-4686 (2003).  
410
- 411 27. Bhattacharyya S, Borthakur A, Dudeja PK, Tobacman JK. Lipopolysaccharide-induced activation of NF-  
412  $\kappa$ B non-canonical pathway requires BCL10 serine 138 and NIK phosphorylations. *Exp Cell Res* **316**, 3317-  
413 3327 (2010).  
414
- 415 28. Amiri KI, Richmond A. Fine tuning the transcriptional regulation of the CXCL1 chemokine. *Prog Nucleic*  
416 *Acid Res Mol Biol* **74**, 1-36 (2003).  
417
- 418 29. Kiriakidis S, Andreacos E, Monaco C, Foxwell B, Feldmann M, Paleolog E. VEGF expression in human  
419 macrophages is NF- $\kappa$ B-dependent: studies using adenoviruses expressing the endogenous NF- $\kappa$ B inhibitor  
420 I $\kappa$ B $\alpha$  and a kinase-defective form of the I $\kappa$ B kinase 2. *Journal of Cell Science* **116**, 665 (2003).  
421  
422
