# Supplementary material for: Exosome loaded immunomodulatory biomaterials alleviate local immune response in immunocompetent diabetic mice post islet xenotransplantation
Source: PubMed Central journal article supplement (PMC8175379; doi:10.1038/s42003-021-02229-4), 2021-06-03
Supplement: 42003_2021_2229_MOESM2_ESM.pdf [file 42003_2021_2229_MOESM2_ESM.pdf]

## **Description of Additional Supplementary Files**

**File name:** Supplementary Data 1

**Description:** Raw data for the main figures.
